# Supplementary material for: PD-1/PD-L1 interaction up-regulates MDR1/P-gp expression in breast cancer cells via PI3K/AKT and MAPK/ERK pathways
Source: PubMed Central journal article supplement (PMC5725139; doi:10.18632/oncotarget.21914), 2017-10-20
Supplement: oncotarget-08-99901-s001.pdf [file oncotarget-08-99901-s001.pdf]

## PD-1/PD-L1 interaction up-regulates MDR1/P-gp expression in breast cancer cells via PI3K/AKT and MAPK/ERK pathways

### SUPPLEMENTARY MATERIALS

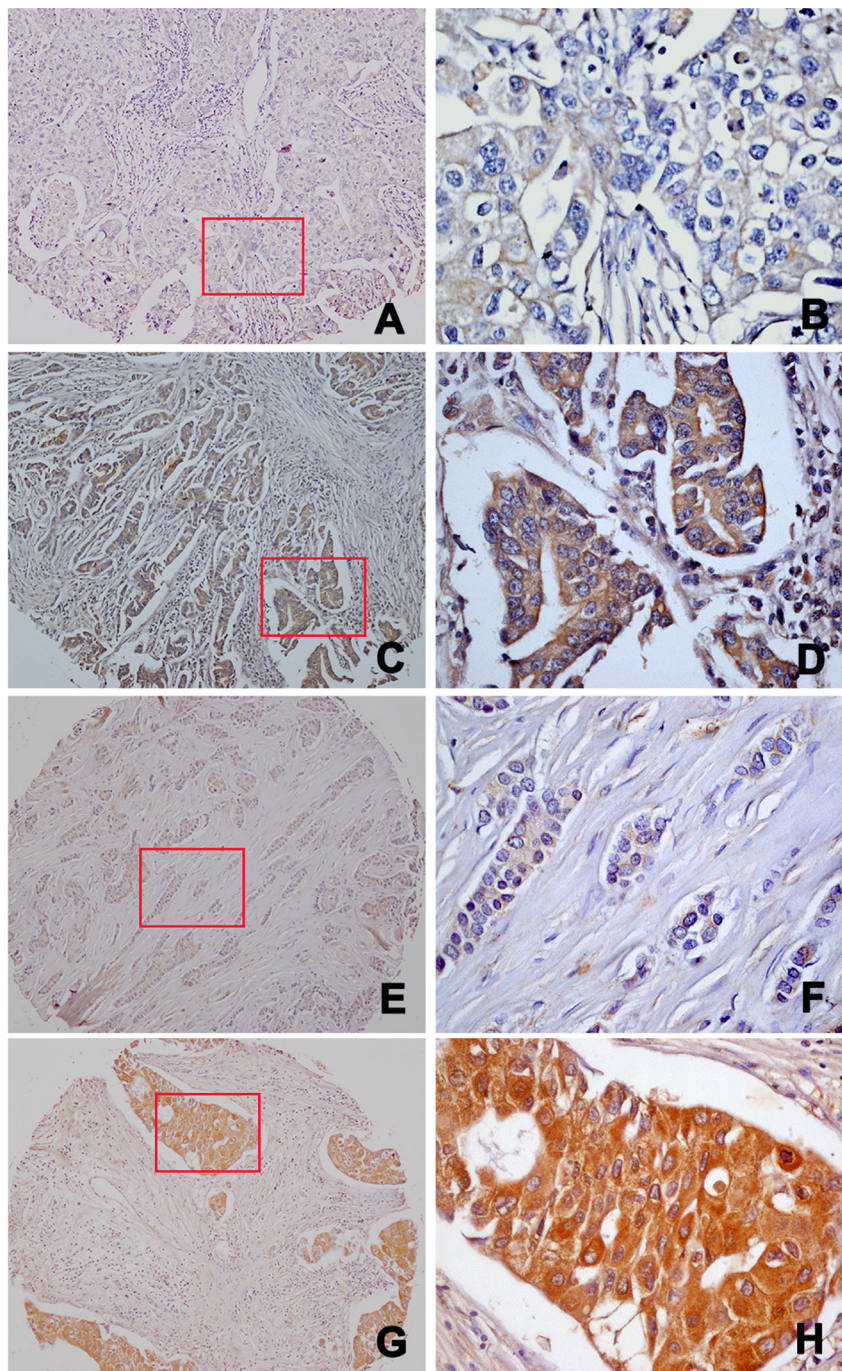

**Supplementary Figure 1: Expression of PD-L1 and MDR1/P-gp in breast cancer tissues.** (A) Low expression of PD-L1 ( $\times 100$ ). (B) Low expression of PD-L1 ( $\times 400$ ). (C) High expression of PD-L1 ( $\times 100$ ). (D) High expression of PD-L1 ( $\times 400$ ). (E) Low expression of MDR1/P-gp ( $\times 100$ ). (F) Low expression of MDR1/P-gp ( $\times 400$ ). (G) High expression of MDR1/P-gp ( $\times 100$ ). (H) High expression of MDR1/P-gp ( $\times 400$ ).

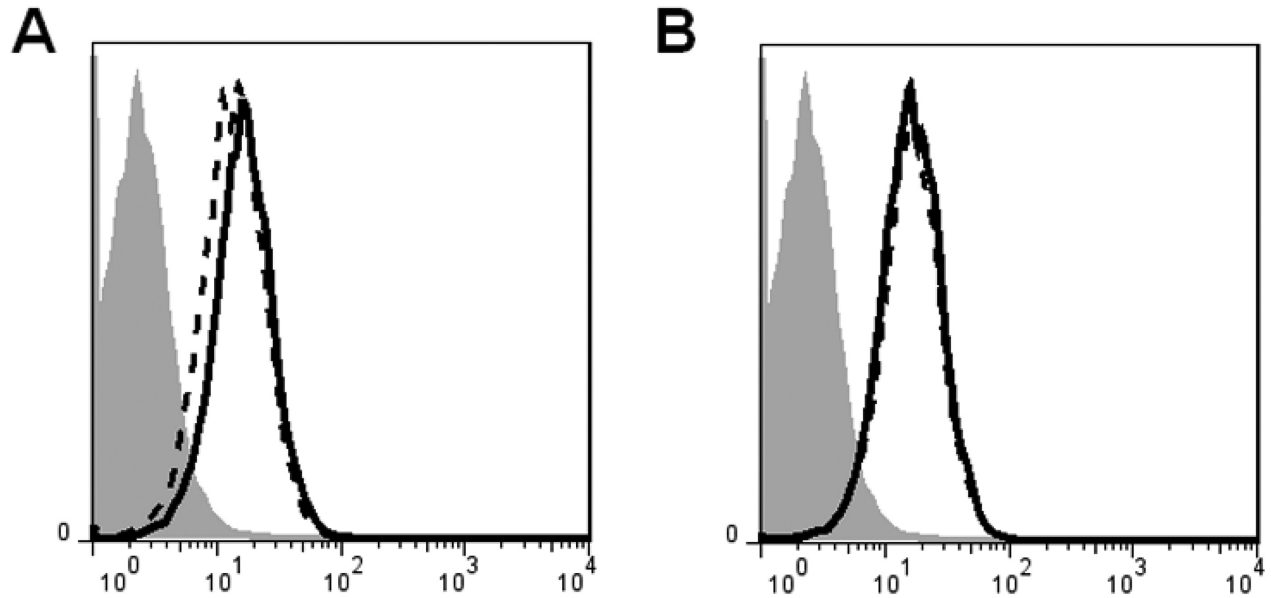

**Supplementary Figure 2: PD-L1 expression of MDA-MB-231 after treatment with LY294002 and PD98059.** (A) PD-L1 expression of MDA-MB-231 after treatment with LY294002. (B) PD-L1 expression of MDA-MB-231 after treatment with PD98059. The shaded histograms indicate staining with PE-labeled isotype control IgG, the solid histograms indicate staining with PE-labeled anti-PD-L1 antibody, and the dashed histograms indicate inhibitors treated cells staining with PE-labeled anti-PD-L1 antibody.
